# Supplementary material for: Same-day genomic and epigenomic diagnosis of brain tumors using real-time nanopore sequencing
Source: Acta Neuropathol. 2017 Jun 21;134(5):691–703. doi: 10.1007/s00401-017-1743-5 (PMC5645447; doi:10.1007/s00401-017-1743-5)
Supplement: Supplementary file 2 — Supplementary material 2 (XLSX 38 kb) [file 401_2017_1743_MOESM2_ESM.xlsx]

## Sheet: Blatt1
Table S1. Whole genome sequencing statistics. Where available, benchmarking of time critical bioinformatics processing steps are provided. N/D, not done. N/A, not available.
	input DNA	sequencing metrics			bioinformatics benchmarking
sample ID	peak fragment size	flow cell	mean mapped read depth	read yield	FASTA extraction	alignment	CpG calling	methylation classification
3523T	N/A	R9.4	0.02	42482	00:40:49	00:11:47	00:30:45	N/A
2197T	19775	R9.4	0.05	84811	00:56:20	00:18:06	00:55:11	00:04:27
3427T	58895	R9.4	0.09	44811	N/A	01:40:52	01:06:36	00:26:29
2402T	28386	R9.4	0.08	106550	01:46:42	00:30:58	01:26:14	00:23:02
2965T	50347	R9.4	0.13	110440	02:00:09	01:08:23	01:49:18	00:37:47
2483T	38483	R9.4	0.04	51303	01:00:24	00:14:07	00:31:57	00:05:23
2922T	38449	R9.4	0.12	122160	01:22:44	01:09:04	01:54:23	00:10:48
6228T	N/A	R9.4	< 0.01	8582	00:04:44	N/A	N/A	00:00:08
5337T	58562	R9.4	0.24	225250	01:49:41	N/A	N/A	00:51:17
8372T	49656	R9.4	0.1	107359	01:00:11	N/A	N/A	00:15:07
MB683	N/A	R9.4	0.2	76463	01:03:15	N/A	N/A	00:35:40
8137T	39969	R9.4	0.04	56683	00:35:07	N/A	N/A	00:06:34
8146T	4568	R9.4	< 0.01	4568	00:03:28	N/A	N/A	00:00:20
7382T	>60000	R9.4	0.07	65299	00:53:33	N/A	N/A	00:11:37
7455T	>60000	R9.4	0.02	24556	00:20:46	N/A	N/A	00:02:28
8355T	>60000	R9.4	0.01	13374	00:07:51	N/A	N/A	00:01:06
8356T	22218	R9.4	< 0.01	8862	00:05:11	N/A	N/A	00:00:35
8357T	53798	R9.4	0.04	60991	00:43:07	N/A	N/A	00:04:13
8358T	>60000	R9.4	0.07	49018	00:34:31	N/A	N/A	00:12:10
8359T	16032	R9.4	< 0.01	5090	00:03:21	N/A	N/A	00:00:32
4596T FFPE	354	R9.4	< 0.01	27277	N/A	N/A	N/A	00:00:03
3718T	15593	R9	0.03	N/A	N/A	N/A	N/A	N/A
3719T	~500	R9	< 0.01	N/A	N/A	N/A	N/A	N/A
2211T	N/A	R9	0.03	N/A	N/A	N/A	N/A	N/A
3724T	20830	R9	0.01	N/A	N/A	N/A	N/A	N/A
